# Supplementary material for: Aqueous solutions of tetraalkylammonium halides: ion hydration, dynamics and ion–ion interactions in light of steric effects
Source: Royal Society of Chemistry journal article supplement (doi:10.1039/c4cp01164c), 2014-01-01
Supplement: c4cp01164c1.pdf [file c4cp01164c1.pdf]

# **Aqueous solutions of tetraalkylammonium halides: ion hydration, dynamics and ion-ion interactions in light of steric effects**

Debsindhu Bhowmik,<sup>†,¶</sup> Natalie Malikova,<sup>\*,†,§</sup> Guillaume Mériguet,<sup>‡</sup> Olivier  
Bernard,<sup>‡</sup> José Teixeira,<sup>†</sup> and Pierre Turq<sup>‡</sup>

*Laboratoire Léon Brillouin (LLB), UMR CEA-CNRS 12, CEA Saclay, 91191  
Gif-sur-Yvette, France, and Sorbonne Universités, UPMC Univ Paris 06, CNRS, UMR  
8234, PHENIX, F-75005, Paris, France*

E-mail: natalie.malikova@upmc.fr

---

\*To whom correspondence should be addressed

<sup>†</sup>LLB

<sup>‡</sup>PHENIX

<sup>¶</sup>Current address: Department of Physics and Astronomy, Wayne State University, 666 W Hancock Street, Detroit, MI 48201

<sup>§</sup>Current address: Sorbonne Universités, UPMC Univ Paris 06, CNRS, UMR 8234, PHENIX, F-75005, Paris, France

## Supporting Information

The Supporting Information includes:

- a) Field Parameters
- b) Simulated and experimental densities for TMABr and TBABr aqueous solutions
- c) Details of water orientation in the hydration shells of cations
- d) NMR diffusion measurements by B. Ancian and G. Mériguet
- e) Methyl group rotation for  $\text{TBA}^+$  and  $\text{TMA}^+$
- f) X-ray scattering intensity - comparison of experimental and simulated data

## a) Field parameters

Table 1: Interaction potentials for TBA<sup>+</sup>. H<sub>N</sub> represents hydrogen atoms closest to the central nitrogen atom.

| atom or group<br>(in bold)                                            | atomic charge (e) |           |          |
|-----------------------------------------------------------------------|-------------------|-----------|----------|
|                                                                       | N                 | C         | H        |
| <b>-N-</b>                                                            | 0.056669          |           |          |
| <b>-N-CH<sub>2</sub>-</b>                                             |                   | 0.017461  | 0.053130 |
| <b>-N-CH<sub>2</sub>-CH<sub>2</sub>-</b>                              |                   | -0.002556 | 0.021844 |
| <b>-N-CH<sub>2</sub>-CH<sub>2</sub>-CH<sub>2</sub>-</b>               |                   | 0.011361  | 0.020886 |
| <b>-N-CH<sub>2</sub>-CH<sub>2</sub>-CH<sub>2</sub>-CH<sub>3</sub></b> |                   | -0.086548 | 0.034799 |

  

| bond elongation<br>harmonic parameters | energy term                | length |
|----------------------------------------|----------------------------|--------|
|                                        | (kcal/mol/Å <sup>2</sup> ) | (Å)    |
| C-H <sub>C</sub>                       | 340                        | 1.090  |
| C-H <sub>N</sub>                       | 240                        | 1.090  |
| C-C                                    | 310                        | 1.526  |
| C-N                                    | 367                        | 1.471  |

  

| bond bending<br>harmonic parameters | energy term                  | angle    |
|-------------------------------------|------------------------------|----------|
|                                     | (kcal/mol/rad <sup>2</sup> ) | (degree) |
| H <sub>C</sub> -C-H <sub>C</sub>    | 35                           | 109.5    |
| H <sub>N</sub> -C-H <sub>N</sub>    | 35                           | 109.5    |
| C-C-H <sub>C</sub>                  | 50                           | 109.5    |
| C-C-H <sub>N</sub>                  | 50                           | 109.5    |
| C-C-C                               | 40                           | 109.5    |
| C-C-N                               | 80                           | 111.2    |
| H <sub>N</sub> -C-N                 | 50                           | 109.5    |
| C-N-C                               | 50                           | 109.5    |

  

| dihedral interaction               | energy term | angle    |
|------------------------------------|-------------|----------|
|                                    | (kcal/mol)  | (degree) |
| H <sub>C</sub> -C-C-H <sub>C</sub> | 0.15        | 0.0      |
| H <sub>C</sub> -C-C-C              | 0.16        | 0.0      |
| H <sub>C</sub> -C-C-H <sub>N</sub> | 0.15        | 0.0      |
| H <sub>N</sub> -C-C-C              | 0.16        | 180.0    |
| C-C-C-C                            | 0.18        | 0.0      |
| X-C-C-X                            | 0.15        | 0.0      |
| X-C-N-X                            | 0.15        | 0.0      |

  

| LJ parameters  | ε          | σ      |
|----------------|------------|--------|
|                | (kcal/mol) | (Å)    |
| H <sub>C</sub> | 0.0157     | 1.487  |
| H <sub>N</sub> | 0.0157     | 1.100  |
| C              | 0.1094     | 1.900  |
| N              | 0.1700     | 1.8240 |

Table 2: Interaction potentials for TMA<sup>+</sup>.

| atom or group<br>(in bold)             | atomic charge (e)                           |                   |          |
|----------------------------------------|---------------------------------------------|-------------------|----------|
|                                        | N                                           | C                 | H        |
| <b>-N-</b>                             | 0.096521                                    |                   |          |
| <b>-N-CH<sub>3</sub></b>               |                                             | -0.165381         | 0.130417 |
| bond elongation<br>harmonic parameters | energy term<br>(kcal/mol/Å <sup>2</sup> )   | length<br>(Å)     |          |
| C-H                                    | 240                                         | 1.090             |          |
| C-N                                    | 367                                         | 1.471             |          |
| bond bending<br>harmonic parameters    | energy term<br>(kcal/mol/rad <sup>2</sup> ) | angle<br>(degree) |          |
| H-C-H                                  | 35                                          | 109.5             |          |
| H-C-N                                  | 50                                          | 109.5             |          |
| C-N-C                                  | 50                                          | 109.5             |          |
| dihedral interaction                   | energy term<br>(kcal/mol)                   | angle<br>(degree) |          |
| X-C-N-X                                | 0.15                                        | 0.0               |          |
| LJ parameters                          | $\epsilon$<br>(kcal/mol)                    | $\sigma$<br>(Å)   |          |
| H                                      | 0.0157                                      | 1.100             |          |
| C                                      | 0.1094                                      | 1.900             |          |
| N                                      | 0.1700                                      | 1.8240            |          |

Table 3: Interaction parameters for monoatomic ions.

| atom | LJ $\epsilon$<br>(kcal/mol) | LJ $\sigma$<br>(Å) | charge<br>(e) |
|------|-----------------------------|--------------------|---------------|
| Na   | 0.1                         | 2.583              | +1.0          |
| Br   | 0.1                         | 4.54               | -1.0          |

b) Simulated and experimental densities for TMABr and TBABr aqueous solutions

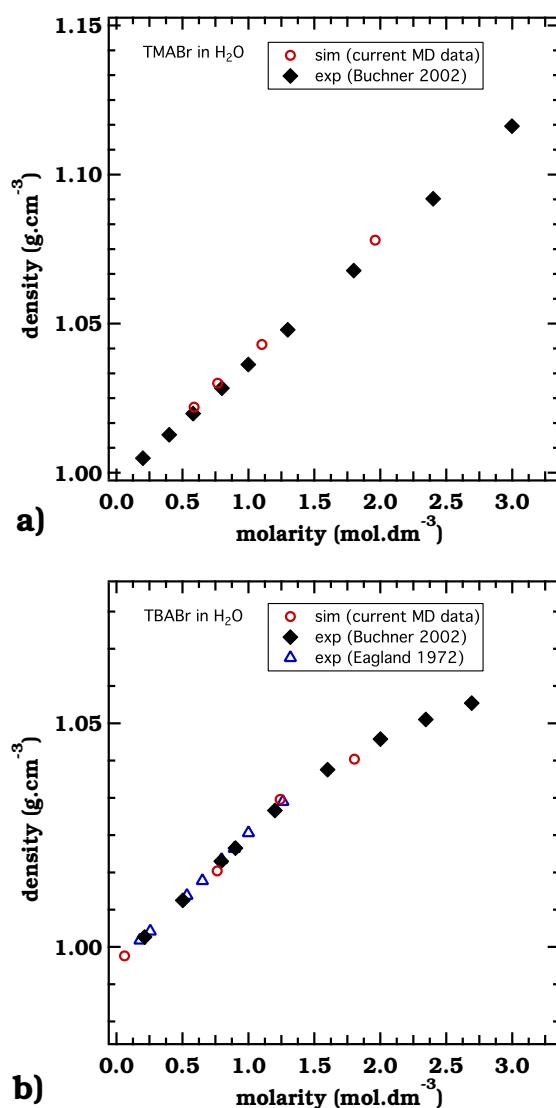

Figure 1: Simulated and experimental densities for a) TMABr aqueous solutions and b) TBABr aqueous solutions, as a function of concentration. Experimental data is taken from *R. Buchner, C. Holz, J. Stauber and J. Barthel, Phys. Chem. Chem. Phys., 2002, 4, 2169 - 2179* and *D. Eagland and G. Pilling, J. Phys. Chem., 1972, 76, 1902 - 1906*.

### c) Details of water orientation in the hydration shells of cations

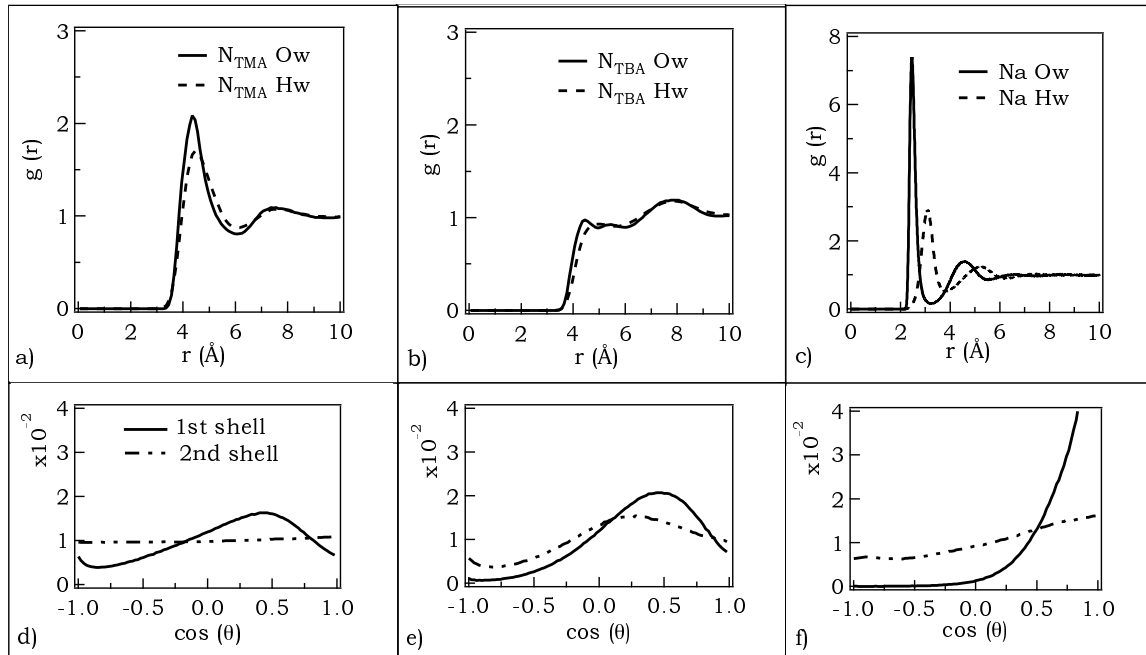

Figure 2: Details of water orientation around cations for TMABr, TBABr and NaBr solutions, all at 1m concentration: a) to c) Radial distribution functions between cations (central N atom or Na) and oxygen/hydrogen (Ow/Hw) atoms of surrounding water molecules; d) to f) Angular distribution of water molecules surrounding the cations, with  $\theta$  representing the angle between the cation-Ow vector and the dipole moment vector of the water molecule. In the case of TMA<sup>+</sup> and TBA<sup>+</sup>, the most probable values of  $\theta$  are around 60°, which is a close to tangential orientation of the water molecules with respect to the central N atom of the cations. We see that this preferential orientation is lost in the second hydration shell of TMA<sup>+</sup>, while it is retained in case of TBA<sup>+</sup>. The distinction between the first and second shell in case of TBA<sup>+</sup> is taken as below or above N-O<sub>w</sub> distance of 6.2 Å

## d) NMR diffusion measurements by B. Ancian and G. Mériquet

UPMC - Univ Paris 6 and CNRS (UMR 7195) , Laboratoire PECSA, Case 51, 4 place Jussieu, Paris F-75005, France

All diffusion experiments were recorded at 298 K using a  $^1\text{H}/^{13}\text{C}/^{15}\text{N}$  TXI inverse probe on a Bruker Avance DRX 500 NMR spectrometer operating at 499.76 MHz for  $^1\text{H}$  using the so-called bipolar pulse pair longitudinal eddy current delay sequence (BPP-LED) (*Johnson CS (1999) Diffusion ordered nuclear magnetic resonance spectroscopy: principles and applications. Prog NMR Spectrosc 34:203-256*). The  $^1\text{H}$  nominal  $90^\circ$  pulse was around  $10\ \mu\text{s}$  and measured systematically on the actual sample. The maximum value of the gradient ( $56.5\ \text{G cm}^{-1}$ ) has been calibrated with the value of the self-diffusion coefficient of HOD in  $\text{D}_2\text{O}$ .

For each sample, a series of 32 spectra with increasing gradient value (from 0 to 56 % of the maximum value) were recorded. The data were analysed using the NMRPipe processing software package (*Delaglio F, Grzesiek S, Vuister GW, Zhu G, Pfeifer J, Bax A 736 (1995) NMRPipe: a multidimensional spectral processing system based on UNIX pipes. J Biomol NMR 6:277-293*). Rectangular gradients of constant duration (3 ms) were chosen for encoding and decoding, whereas the spoil gradient (2 ms) was sine-shaped. The LED was kept at a value of 10 ms in all the experiments. Each diffusion constant has been obtained using at least three diffusion times,  $\Delta$ , from 25 to 500 ms.

e) Methyl group rotation for  $\text{TBA}^+$  and  $\text{TMA}^+$

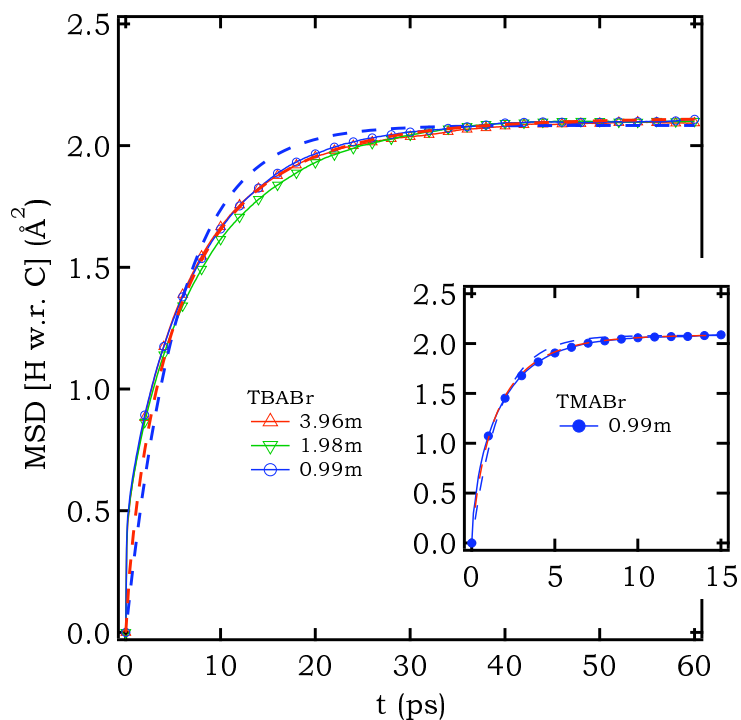

Figure 3: Investigation of methyl group rotation for  $\text{TBA}^+$  and  $\text{TMA}^+$ : Mean square displacement (MSD) for H atoms of terminal methyl groups with respect to the adjacent C atoms, versus time, for  $\text{TBA}^+$  in selected TBABr solutions; inset features the same type of data for  $\text{TMA}^+$  in 0.99m TMABr solution. Dashed lines represent the fits of data with Equation 3 of the main article or its extension, which uses the same values of  $b_{\text{C-H}}$  and  $\phi$ , but allows a range of characteristic rotational times (these are distributed according to a Gaussian function truncated at zero to avoid non-physical negative characteristic times). The obtained spread (standard deviation) of characteristic rotational times is significant, of the order of the mean value, i.e. 3-5 ps for  $\text{TBA}^+$  and 2 ps for  $\text{TMA}^+$ .



## f) X-ray scattering intensity - comparison of experimental and simulated data

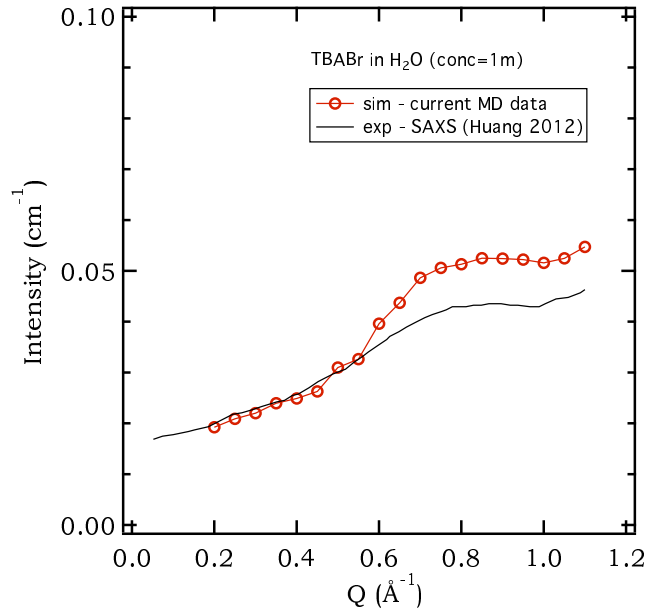

Figure 4: X-ray scattering intensity (in  $\text{cm}^{-1}$ ) versus wave-vector,  $Q$ , for TBABr solution in  $\text{H}_2\text{O}$  at 1m concentration determined experimentally in ref *N. Huang, D. Schlesinger, D. Nordlund, C. Huang, T. Tyliczszak, T. M. Weiss, Y. Acremann, L. G. M. Pettersson and A. Nilsson, J. Chem. Phys., 2012, 136, 074507.* and calculated from the current MD simulations using the nMoldyn package. The principal difference between the calculation of X-ray and neutron coherent scattering signal is the use of a  $Q$  dependent X-ray scattering length for each atom in the former, instead of the  $Q$ -independent coherent neutron scattering length/cross-section for each atom in the latter. The  $Q$ -dependent X-ray scattering length was calculated using the D. Cromer and J. Mann formula from *D. Waasmaier and A. Kirfel, New Analytical Scattering-Factor Functions for Free Atoms and Ions, Acta Cryst. (1995). A51,416-43.*
